# Supplementary material for: Electrochemical investigation of uncapped AgBiS2 (schapbachite) synthesized using in situ melts of xanthate precursors
Source: Royal Society of Chemistry journal article supplement (doi:10.1039/c9dt00242a), 2019-01-01
Supplement: c9dt00242a1.pdf [file c9dt00242a1.pdf]

## **Electrochemical investigation of uncapped AgBiS<sub>2</sub> (Schapbachite) synthesized by *in situ* melts of xanthate precursors**

Malik Dilshad Khan,<sup>a\*</sup> Muhammad Aamir,<sup>b</sup> Manzar Sohail,<sup>c</sup> Sanket Bhoyate,<sup>d</sup> Megan Hyatt,<sup>e</sup>  
Ram K. Gupta,<sup>d</sup> Muhammad Sher,<sup>f</sup> Neerish Revaprasadu,<sup>a\*</sup>

<sup>a</sup>Department of Chemistry, University of Zululand, Private Bag X1001, Kwa-Dlangezwa, 3880, South Africa.

<sup>b</sup>Materials Lab, Department of Chemistry, Mirpur University of Science and Technology, Allama Iqbal Road, Mirpur AJK, Pakistan.

<sup>c</sup>Centre of Research Excellence in Nanotechnology, King Fahd University of Petroleum and Minerals, Dhahran, 31261, Saudi Arabia.

<sup>d</sup>Department of Chemistry, Pittsburg State University, Pittsburg, KS 66762, USA.

<sup>e</sup>Labette County High School, Altamont, KS 67330, USA.

<sup>f</sup>Department of Chemistry, Allama Iqbal Open University, Islamabad, Pakistan.

\*E-mail: RevaprasaduN@unizulu.ac.za

### **Supplementary Data**

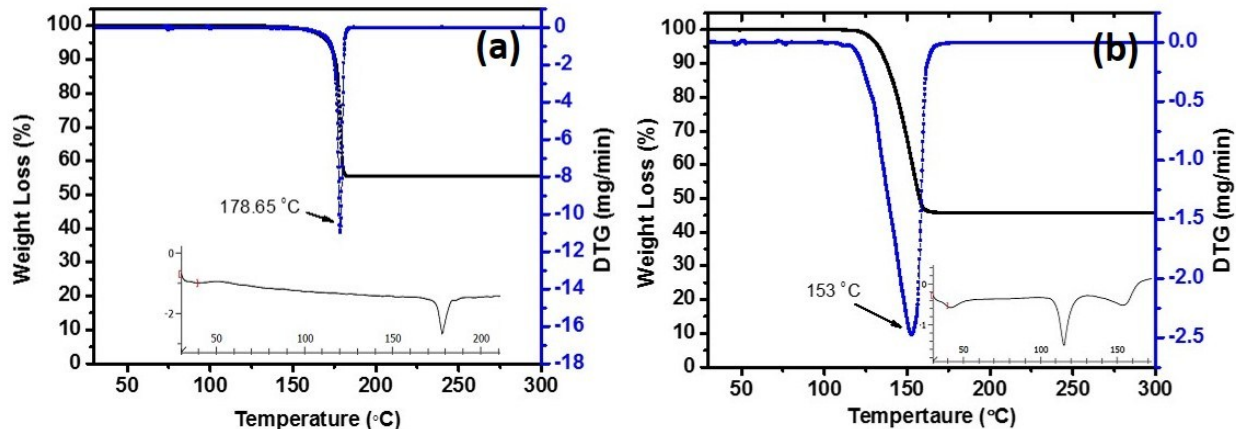

Figure S1. TGA and heat flow curves for (a) (*O*-ethylthiocarbonato)silver(I) and (b) *tris*(*O*-ethylthiocarbonato)bismuth(III) complex.

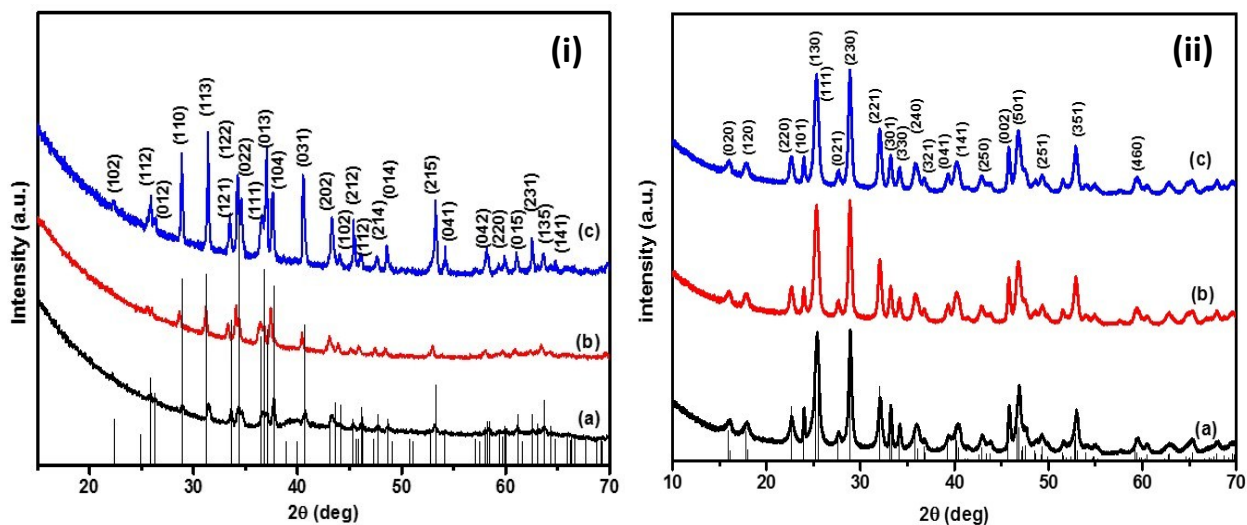

Figure S2 (i) p-XRD pattern of monoclinic  $\text{Ag}_2\text{S}$  (acanthite, ICDD # 00-024-0715) synthesized by pyrolysis of (*O*-ethylthiocarbonato)silver(I) complex at (a) 200 °C, (b) 250 °C and (c) 300 °C. (ii) p-XRD pattern of orthorhombic  $\text{Bi}_2\text{S}_3$  (bismuthinite, ICDD# 01-075-1306) synthesized by pyrolysis of *tris*(*O*-ethylthiocarbonato)bismuth(III) complex at (a) 200 °C, (b) 250 °C and (c) 300 °C.

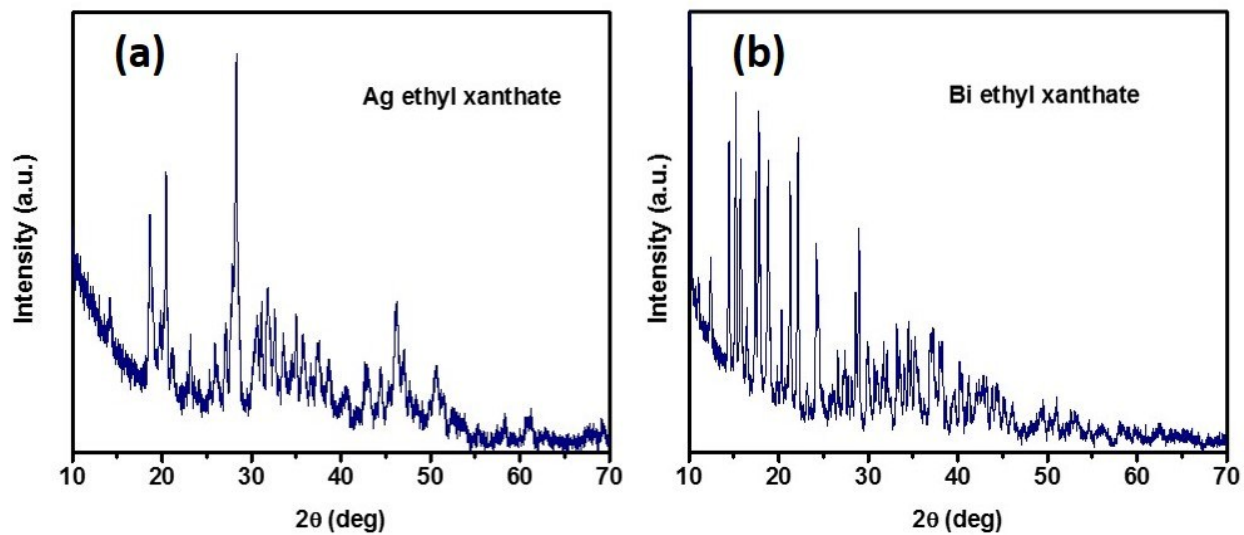

Figure S3. p-XRD of (a) silver ethyl xanthate and (b) bismuth ethyl xanthate, complexes.

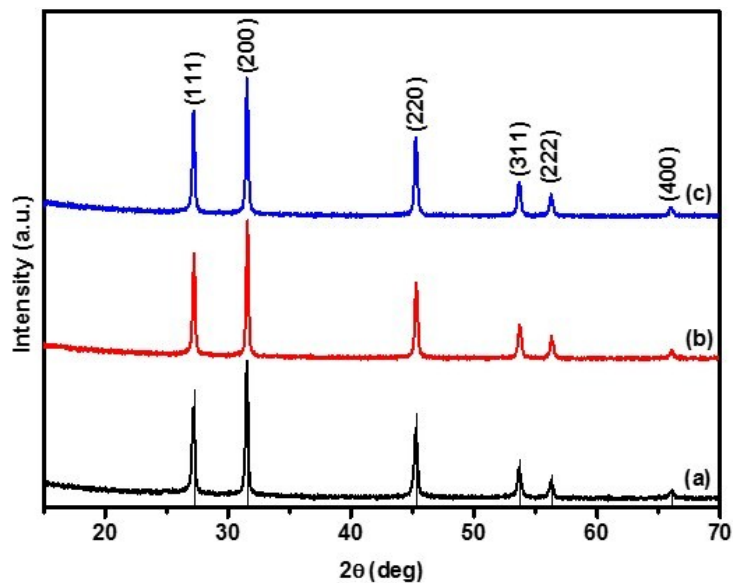

Figure S4. p-XRD pattern of cubic  $\text{AgBiS}_2$  (schapbachite) synthesized at (a) 200 °C, (b) 250 °C and (c) 300 °C by melt method.

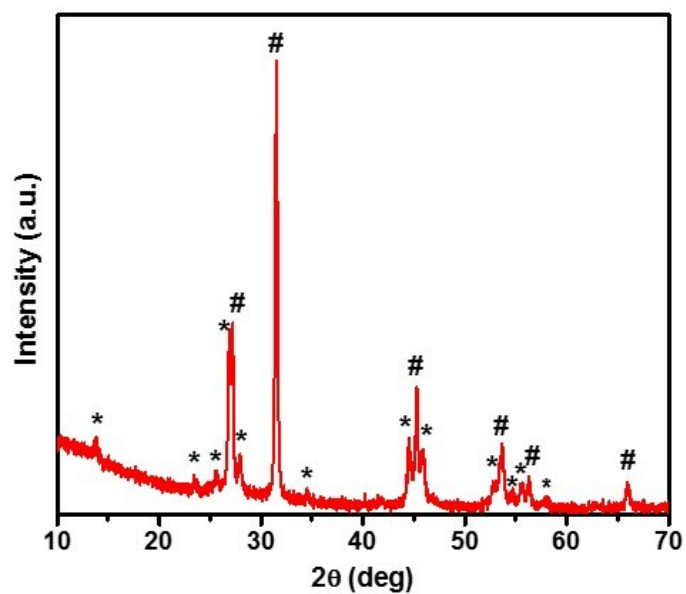

Figure S5. p-XRD pattern of  $\text{AgBiS}_2$  synthesized at  $150\text{ }^\circ\text{C}$ , where (\*) represent the peaks for matildite phase and (#) represent schapbachite phase.

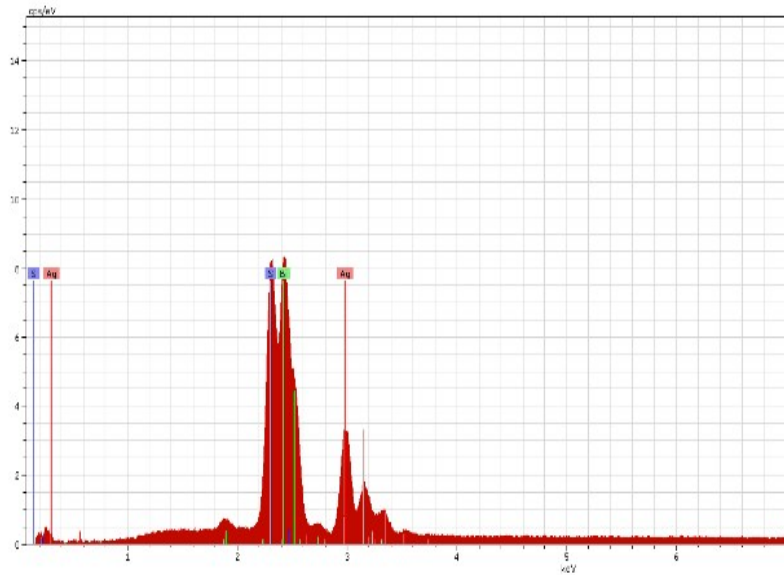

Figure S6. EDX spectrum of  $\text{AgBiS}_2$  synthesized at  $250\text{ }^\circ\text{C}$ .

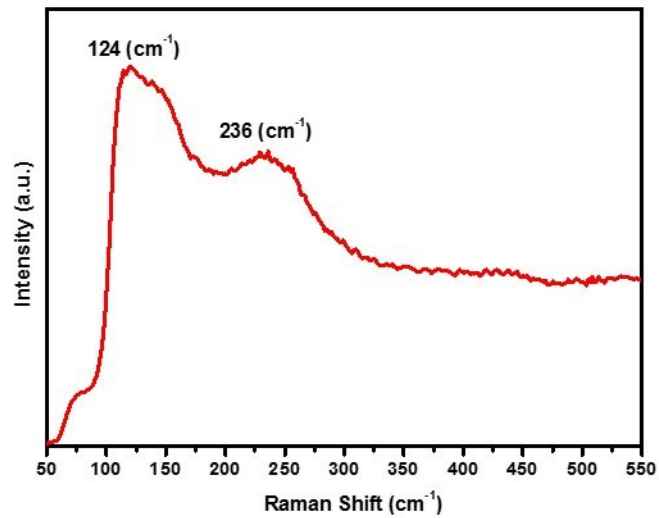

Figure S7. Raman spectrum of AgBiS<sub>2</sub> synthesized at 250 °C.

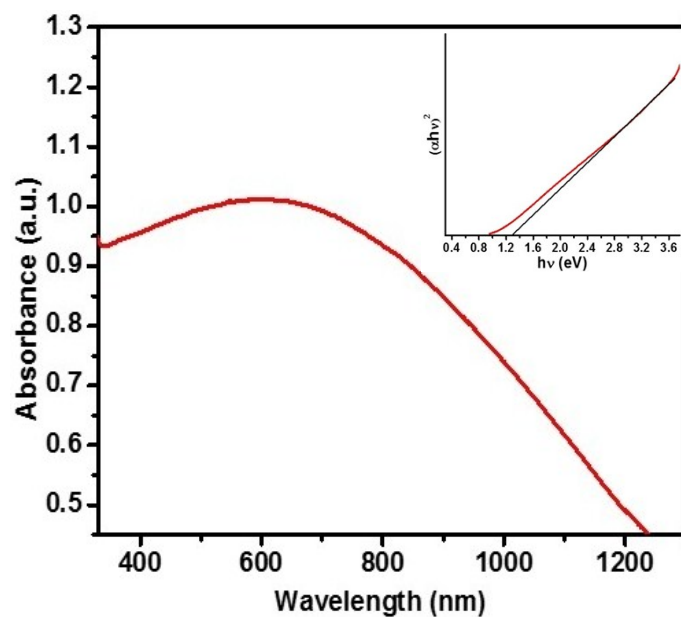

Figure S8. UV-Vis-NIR spectrum of AgBiS<sub>2</sub> and (inset) shows estimated band gap by Tauc plot.

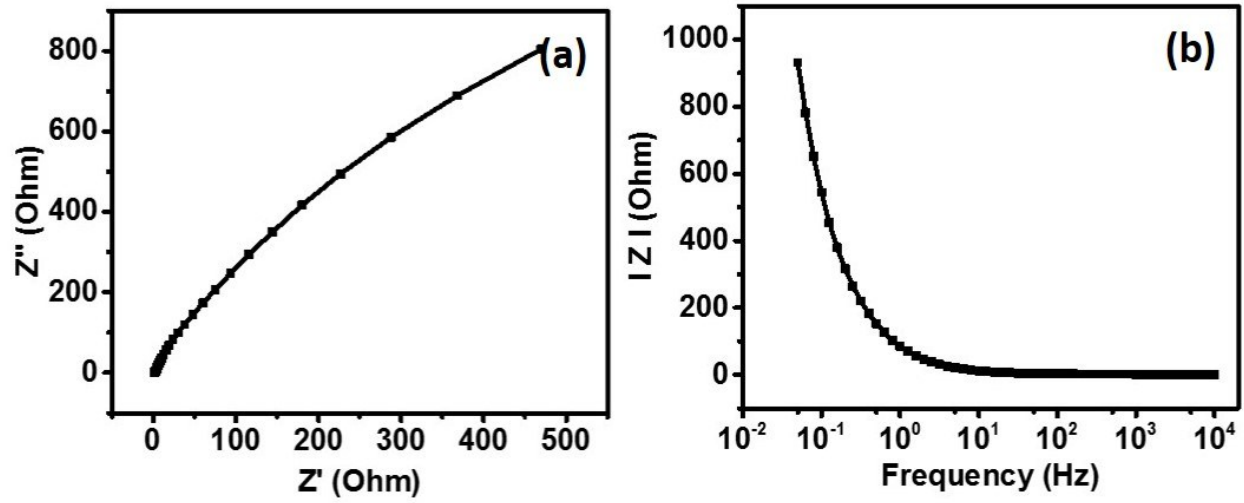

Figure S9. (a)  $Z_{\text{real}}$  vs.  $Z_{\text{img}}$  plot and (b)  $|Z|$  vs. frequency plot for  $\text{AgBiS}_2$ .

**Table S1.** Comparison of specific capacitance of other reported oxide and sulfide-based materials.

| <b>Samples</b>                                                   | <b>Specific capacitance (F/g)</b> | <b>Reference</b> |
|------------------------------------------------------------------|-----------------------------------|------------------|
| Bi <sub>2</sub> S <sub>3</sub> -Graphene composite               | 290                               | 1                |
| Microwave-assisted CoS                                           | 224                               | 2                |
| CoS                                                              | ~435                              | 3                |
| CuCo <sub>2</sub> O <sub>4</sub>                                 | 809                               | 4                |
| CuCo <sub>2</sub> S <sub>4</sub>                                 | 443                               | 5                |
| NiCo <sub>2</sub> O <sub>4</sub> films on ITO                    | 490                               | 6                |
| NiCo <sub>2</sub> O <sub>4</sub> coral-like porous crystals      | 217                               | 7                |
| NiCo <sub>2</sub> S <sub>4</sub>                                 | 800                               | 8                |
| NiCo <sub>2</sub> S <sub>4</sub> /Fe <sub>2</sub> O <sub>3</sub> | 342                               | 9                |
| AgBiS <sub>2</sub>                                               | 440                               | <b>This work</b> |

1. Vadivel, S.; Naveen, A. N.; Kamalakannan, V.; Cao, P.; Balasubramanian, N., Facile large scale synthesis of Bi<sub>2</sub>S<sub>3</sub> nano rods–graphene composite for photocatalytic photoelectrochemical and supercapacitor application. *Applied Surface Science* **2015**, 351, 635-645.
2. You, B.; Jiang, N.; Sheng, M.; Sun, Y., Microwave vs. solvothermal synthesis of hollow cobalt sulfide nanoprisms for electrocatalytic hydrogen evolution and supercapacitors. *Chemical Communications* **2015**, 51, (20), 4252-4255.
3. Meng, X.; Deng, J.; Zhu, J.; Bi, H.; Kan, E.; Wang, X., Cobalt sulfide/graphene composite hydrogel as electrode for high-performance pseudocapacitors. *Scientific reports* **2016**, 6, 21717.
4. Vijayakumar, S.; Lee, S.-H.; Ryu, K.-S., Hierarchical CuCo<sub>2</sub>O<sub>4</sub> nanobelts as a supercapacitor electrode with high areal and specific capacitance. *Electrochimica Acta* **2015**, 182, 979-986.
5. Xu, Y.; Zhou, T.; Cao, X.; Zhao, W.; Chang, J.; Zhu, W.; Guo, W.; Du, W., Low-cost synthesis and electrochemical characteristics of ternary Cu-Co sulfides for high performance full-cell asymmetric supercapacitors. *Materials Research Bulletin* **2017**, 91, 68-76.
6. Salunkhe, R. R.; Jang, K.; Yu, H.; Yu, S.; Ganesh, T.; Han, S.-H.; Ahn, H., Chemical synthesis and electrochemical analysis of nickel cobaltite nanostructures for supercapacitor applications. *Journal of Alloys and Compounds* **2011**, 509, (23), 6677-6682.
7. Wu, Y. Q.; Chen, X. Y.; Ji, P. T.; Zhou, Q. Q., Sol–gel approach for controllable synthesis and electrochemical properties of NiCo<sub>2</sub>O<sub>4</sub> crystals as electrode materials for application in supercapacitors. *Electrochimica Acta* **2011**, 56, (22), 7517-7522.
8. Xiao, T.; Li, J.; Zhuang, X.; Zhang, W.; Wang, S.; Chen, X.; Xiang, P.; Jiang, L.; Tan, X., Wide potential window and high specific capacitance triggered via rough NiCo<sub>2</sub>S<sub>4</sub> nanorod arrays with open top for symmetric supercapacitors. *Electrochimica Acta* **2018**, 269, 397-404.
9. Jia, R.; Zhu, F.; Sun, S.; Zhai, T.; Xia, H., Dual support ensuring high-energy supercapacitors via high-performance NiCo<sub>2</sub>S<sub>4</sub>@ Fe<sub>2</sub>O<sub>3</sub> anode and working potential enlarged MnO<sub>2</sub> cathode. *Journal of Power Sources* **2017**, 341, 427-434.
